# Supplementary material for: Inadequate Ultrasound Examination in Hepatocellular Carcinoma Surveillance: A Systematic Review and Meta-Analysis
Source: MDPI journal article supplement (doi:10.3390/jcm10163535), 2021-08-12

**Supplementary Table S1. Search queries**

| No. | Search queries for MEDLINE                                                                                                                                                                                                                      |
|-----|-------------------------------------------------------------------------------------------------------------------------------------------------------------------------------------------------------------------------------------------------|
| #1  | "Carcinoma, Hepatocellular"[Mesh] OR "Liver Neoplasms"[Mesh:NoExp]                                                                                                                                                                              |
| #2  | (liver*[TW] OR hepatic*[TW] OR Hepato*[TW]) AND (carcinoma*[TW] OR cancer[TW] OR cancers[TW] OR tumor[TW] OR neoplas*[TW] OR malignan*[TW])                                                                                                     |
| #3  | hepatocarcinoma*[TW] OR hepatoma*[TW] OR "liver carcinoma"[TW] OR HCC[TW]                                                                                                                                                                       |
| #4  | #1 OR #2 OR #3                                                                                                                                                                                                                                  |
| #5  | "Ultrasonography"[Mesh]                                                                                                                                                                                                                         |
| #6  | ultrasonograp*[TW] OR Ultrasound*[TW] OR Ultrasonic*[TW]                                                                                                                                                                                        |
| #7  | #5 OR #6                                                                                                                                                                                                                                        |
| #8  | surveillanc*[TW] OR Monitoring*[TW]                                                                                                                                                                                                             |
| #9  | "Population Surveillance"[Mesh] OR "Early Detection of Cancer"[Mesh] OR "mass screening"[MeSH] OR "Epidemiological Monitoring"[Mesh]                                                                                                            |
| #10 | #8 OR #9                                                                                                                                                                                                                                        |
| #11 | "Predictive Value of Tests"[Mesh] OR "Sensitivity and Specificity"[Mesh]                                                                                                                                                                        |
| #12 | predictive value*[TW] OR predictor*[TW] OR detection rate*[TW] OR "False Negative"[TW] OR "False positive"[TW] OR "True Negative"[TW] OR "True positive"[TW] OR "PPV"[TW] OR "NPV"[TW] OR OR Sensitivit*[TW] OR Specificit*[TW] OR accurac*[TW] |
| #13 | failure*[TW] OR adequat*[TW] OR inadequat*[TW] OR poor*[TW]                                                                                                                                                                                     |
| #14 | #11 OR #12 OR #13                                                                                                                                                                                                                               |
| #15 | #4 AND #7 AND #10 AND #14                                                                                                                                                                                                                       |
| #16 | #15 AND (English[Lang])                                                                                                                                                                                                                         |
| No. | Search queries for EMBASE                                                                                                                                                                                                                       |
| #1  | 'liver cell carcinoma'/exp OR 'liver cancer'/de                                                                                                                                                                                                 |
| #2  | ((liver* OR hepatic* OR Hepato*) NEAR/6 (Carcinoma* OR Cancer* OR tumor* OR Neoplas* OR malignan*)):ab,ti,kw                                                                                                                                    |
| #3  | (hepatocarcinoma* OR hepatoma* OR 'liver carcinoma' OR HCC):ab,ti,kw                                                                                                                                                                            |

| #4  | #1 OR #2 OR #3                                                                                                                                                                                                                                                                                                                               |
|-----|----------------------------------------------------------------------------------------------------------------------------------------------------------------------------------------------------------------------------------------------------------------------------------------------------------------------------------------------|
| #5  | 'echography'/exp                                                                                                                                                                                                                                                                                                                             |
| #6  | (ultrasonograp* OR Ultrasound* OR Ultrasonic*):ab,ti,kw                                                                                                                                                                                                                                                                                      |
| #7  | #5 OR #6                                                                                                                                                                                                                                                                                                                                     |
| #8  | (surveillanc* OR Monitoring*):ab,ti,kw                                                                                                                                                                                                                                                                                                       |
| #9  | 'early cancer diagnosis'/exp OR 'cancer screening'/exp OR 'disease surveillance'/exp                                                                                                                                                                                                                                                         |
| #10 | #8 OR #9                                                                                                                                                                                                                                                                                                                                     |
| #11 | 'diagnostic accuracy'/exp OR 'predictive value'/exp OR 'sensitivity and specificity'/de<br>( 'predictive value' OR 'predictive values' OR predictor* OR 'detection rate' OR 'detection rates' OR 'False<br>Negative' OR 'False positive' OR 'True Negative' OR 'True positive' OR 'PPV' OR 'NPV' OR Sensitivity*<br>OR Specificit*):ab,ti,kw |
| #12 |                                                                                                                                                                                                                                                                                                                                              |
| #13 | (Diagnos* NEAR/3 Accurac*):ab,ti,kw                                                                                                                                                                                                                                                                                                          |
| #14 | (failure* OR adequat* OR inadequat* OR poor*):ab,ti,kw                                                                                                                                                                                                                                                                                       |
| #15 | #11 OR #12 OR #13 OR #14                                                                                                                                                                                                                                                                                                                     |
| #16 | #4 AND #7 AND #10 AND #15                                                                                                                                                                                                                                                                                                                    |
| #17 | #16 AND ([english]/lim)                                                                                                                                                                                                                                                                                                                      |
| No. | Search Queries for Cochrane                                                                                                                                                                                                                                                                                                                  |
| #1  | [mh "Carcinoma, Hepatocellular"] or [mh ^"Liver Neoplasms"]                                                                                                                                                                                                                                                                                  |
| #2  | ((Hepatocellular* or liver-cell* or hepatic-cell* or Hepato-cell*) near/6 (Cancer* or tumor* or Neoplas* or carcinoma*)):ab,ti,kw                                                                                                                                                                                                            |
| #3  | hepatocarcinoma*:ab,ti,kw or hepatoma*:ab,ti,kw or "liver carcinoma":ab,ti,kw or HCC:ab,ti,kw                                                                                                                                                                                                                                                |
| #4  | #1 or #2 or #3                                                                                                                                                                                                                                                                                                                               |
| #5  | [mh "Ultrasonography"]                                                                                                                                                                                                                                                                                                                       |
| #6  | (ultrasonograp* or Ultrasound* OR Ultrasonic* OR US):ab,ti,kw                                                                                                                                                                                                                                                                                |
| #7  | #5 or #6                                                                                                                                                                                                                                                                                                                                     |
| #8  | surveillanc*:ab,ti,kw or Monitoring*:ab,ti,kw                                                                                                                                                                                                                                                                                                |
| #9  | [mh "Population Surveillance"] or [mh "Early Detection of Cancer"] or [mh "mass screening"] or [mh "Epidemiological Monitoring"]                                                                                                                                                                                                             |

#10 #8 or #9

#11 [mh "Predictive Value of Tests"] or [mh "Sensitivity and Specificity"]

#12 (predictive value\* or predictor\* or detection rate\* or "False Negative" or "False positive" or "True Negative" or "True positive" or "PPV" or "NPV" or Sensitivit\* or Specificit\* or accurac\*):ab,ti,kw

#13 [mh "Risk Factors"] or (Risk-Factor\* or failure\* or adequat\* or inadequat\* or poor\*):ab,ti,kw

#14 #11 or #12 or #13

#15 #4 and #7 and #10 and #14

#16 #15 in Trials(Published)

**Supplementary Table S2. Newcastle-Ottawa Scale for assessment of the risk of bias in the included studies**

|                        | Selection                                       |                                           |                              |                                                                                      | Comparability                                                               | Outcome                  |                                                          |                                        | Total |
|------------------------|-------------------------------------------------|-------------------------------------------|------------------------------|--------------------------------------------------------------------------------------|-----------------------------------------------------------------------------|--------------------------|----------------------------------------------------------|----------------------------------------|-------|
| Author<br>(year)       | Representative<br>ness of the<br>exposed cohort | Selection of the<br>non-exposed<br>cohort | Ascertainment<br>of exposure | Demonstration<br>that outcome<br>of interest was<br>not present at<br>start of study | Comparability<br>of cohorts on<br>the basis of the<br>design or<br>analysis | Assessment of<br>outcome | Was follow-up<br>long enough<br>for outcomes<br>to occur | Adequacy of<br>follow up of<br>cohorts |       |
| Simmons O<br>(2017)    | 1                                               | 1                                         | 1                            | 1                                                                                    | 2                                                                           | 1                        | 0                                                        | 0                                      | 7     |
| Samoylova ML<br>(2018) | 1                                               | 1                                         | 1                            | 1                                                                                    | 1                                                                           | 0                        | 0                                                        | 0                                      | 5     |
| Kim YY<br>(2019)       | 1                                               | 1                                         | 1                            | 1                                                                                    | 2                                                                           | 1                        | 0                                                        | 0                                      | 7     |
| Millet JD<br>(2019)    | 1                                               | 1                                         | 1                            | 1                                                                                    | 2                                                                           | 1                        | 1                                                        | 0                                      | 8     |
| Son JH<br>(2019)       | 1                                               | 1                                         | 1                            | 1                                                                                    | 2                                                                           | 1                        | 1                                                        | 1                                      | 9     |
| Pinero F<br>(2019)     | 1                                               | 1                                         | 1                            | 1                                                                                    | 0                                                                           | 0                        | 0                                                        | 0                                      | 4     |

Articles are listed according to year of publication and alphabetical order of the names of the first authors within the same year of publication.

Supplementary Figure S1. Forest plots of the odds ratios of age (A), sex (B), hepatitis B infection (C), alcohol abuse (D), alanine aminotransferase (ALT) (E), and model for end-stage liver disease (MELD) (F).

**A Age ( $\geq 60$  years)**

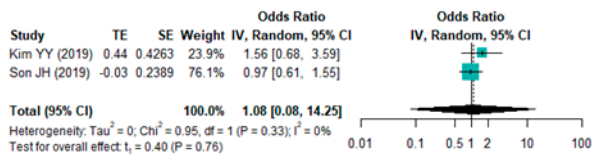

**B Male**

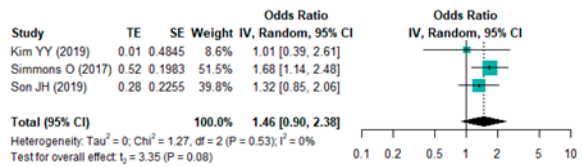

**C Hepatitis B**

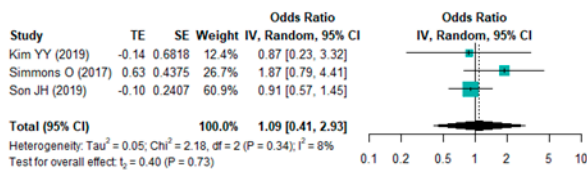

**D Alcohol-related**

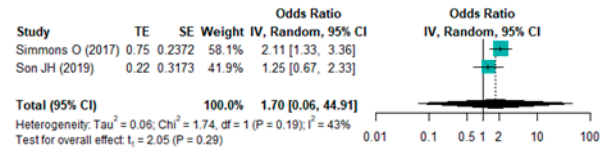

**E ALT > 40 (U/L)**

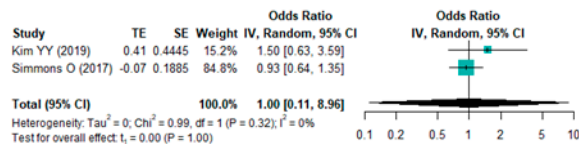

**F MELD score ( $\geq 11$ )**

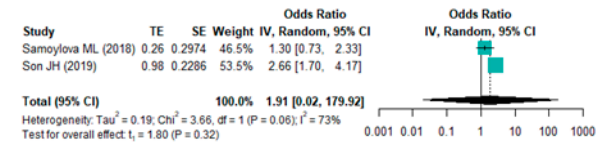

Supplementary Figure S2. Funnel plot for examination of publication bias in studies reporting results for the rate of inadequate US examinations

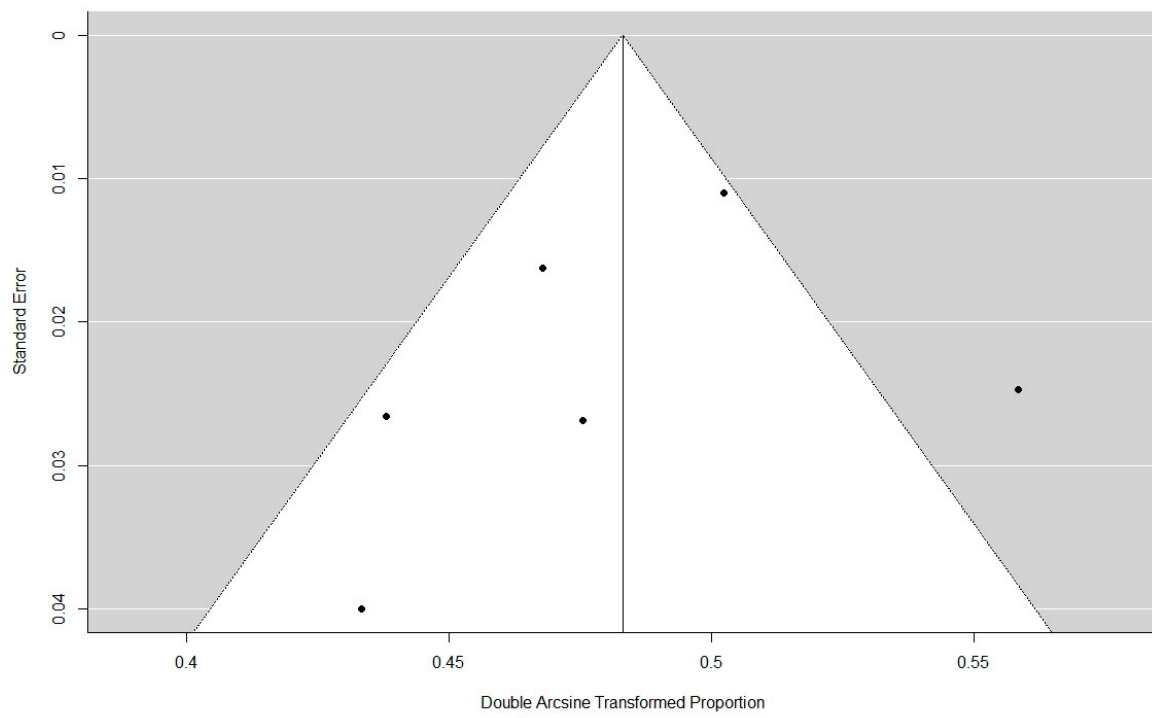

Supplement: s1 [file s1]
